# Supplementary material
Source: publisher figshare collection journal article supplement (https://frontiersin.figshare.com/ndownloader/files/14167775)
Supplement: Supplementary file [file 14167775]

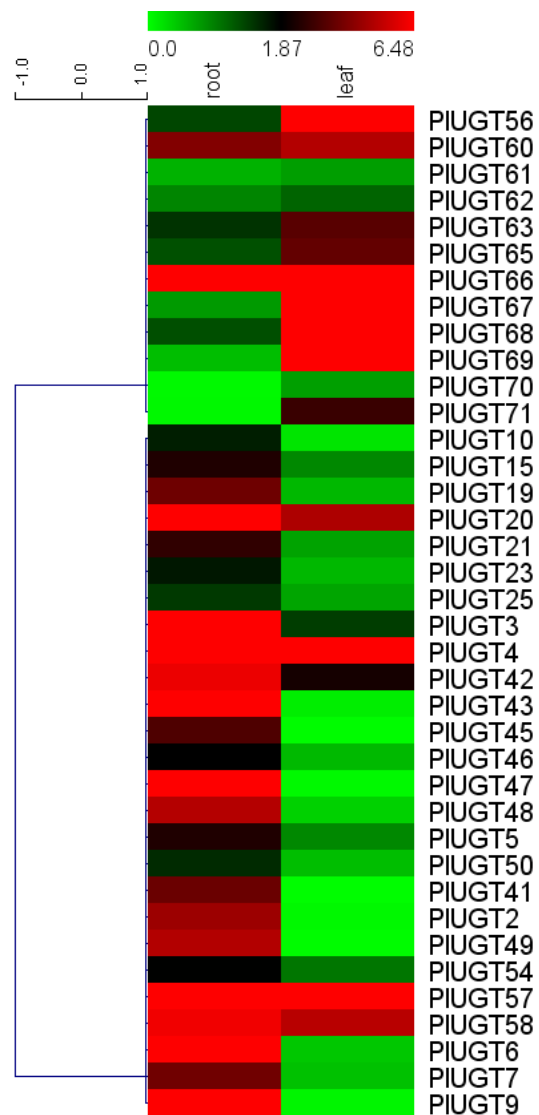

**Supplementary Figure S1** Hierarchical cluster analysis of transcript levels of PIUGTs in the *Pueraria lobata* root and leaf. The genes expression data were retrieved from the RNA-seq results (Wang et al, 2015), and the clustering heatmap was created by using the MultiExperiment Viewer (MEV) software.
